# Supplementary material
Source: MDPI journal article supplement (https://www.mdpi.com/search?q=biology-02-01411)
Supplement: s001 [file additional file 4.xlsx]

## Sheet: pat.table
Characteristic				Lymphoma - 3 subtypes			p-value		Lymphoma - 4 subtypes				p-value
				mBL	intermediate	non-mBL			mBL*	intermediate A	intermediate B	non-mBL*
Total		221		44 ( 20 % )	48 ( 22 % )	129 ( 58 % )			62 ( 28 % )	42 ( 19 % )	44 ( 20 % )	73 ( 33 % )
AGE	< 20 yr	32 ( 14 % )		24 ( 55 % )	6 ( 12 % )	2 ( 2 % )	< 0.001		26 ( 42 % )	0 ( 0 % )	1 ( 2 % )	5 ( 7 % )	< 0.001
	21 - 65 yr	92 ( 42 % )		18 ( 41 % )	21 ( 44 % )	53 ( 41 % )			27 ( 44 % )	14 ( 33 % )	22 ( 50 % )	29 ( 40 % )
	> 66 yr	95 ( 43 % )		2 ( 5 % )	20 ( 42 % )	73 ( 57 % )			9 ( 15 % )	27 ( 64 % )	20 ( 45 % )	39 ( 53 % )
Gender	male	127 ( 57 % )		31 ( 70 % )	25 ( 52 % )	71 ( 55 % )	0.18		40 ( 65 % )	26 ( 62 % )	23 ( 52 % )	38 ( 52 % )	0.44
	female	91 ( 41 % )		13 ( 30 % )	22 ( 46 % )	56 ( 43 % )			22 ( 35 % )	15 ( 36 % )	20 ( 45 % )	34 ( 47 % )
Diagnosis	Burkitt's lymphoma	15 ( 7 % )		15 ( 34 % )	0 ( 0 % )	0 ( 0 % )	< 0.001		15 ( 24 % )	0 ( 0 % )	0 ( 0 % )	0 ( 0 % )	< 0.001
	Atypical Burkitt's lymphoma	20 ( 9 % )		13 ( 30 % )	4 ( 8 % )	3 ( 2 % )			16 ( 26 % )	3 ( 7 % )	0 ( 0 % )	1 ( 1 % )
	Diffuse large-B-cell lymphoma	164 ( 74 % )		10 ( 23 % )	39 ( 81 % )	115 ( 89 % )			24 ( 39 % )	37 ( 88 % )	38 ( 86 % )	65 ( 89 % )
	Mature aggressive B-cell lymphoma, unclassifiable	18 ( 8 % )		4 ( 9 % )	5 ( 10 % )	9 ( 7 % )			5 ( 8 % )	2 ( 5 % )	5 ( 11 % )	6 ( 8 % )
Ann Arbor Stage	I or II	72 ( 33 % )		20 ( 45 % )	18 ( 38 % )	34 ( 26 % )	0.01		25 ( 40 % )	9 ( 21 % )	15 ( 34 % )	23 ( 32 % )	0.37
	III or IV	82 ( 37 % )		12 ( 27 % )	12 ( 25 % )	58 ( 45 % )			19 ( 31 % )	15 ( 36 % )	22 ( 50 % )	26 ( 36 % )
Response to treatment	Complete remission	68 ( 31 % )		23 ( 52 % )	15 ( 31 % )	30 ( 23 % )	0.04		27 ( 44 % )	8 ( 19 % )	10 ( 23 % )	23 ( 32 % )	0.40
	Complete remission, unconfirmed	18 ( 8 % )		3 ( 7 % )	3 ( 6 % )	12 ( 9 % )			4 ( 6 % )	2 ( 5 % )	6 ( 14 % )	6 ( 8 % )
	No change	2 ( 1 % )		0 ( 0 % )	1 ( 2 % )	1 ( 1 % )			0 ( 0 % )	0 ( 0 % )	1 ( 2 % )	1 ( 1 % )
	Partial response	16 ( 7 % )		0 ( 0 % )	3 ( 6 % )	13 ( 10 % )			1 ( 2 % )	3 ( 7 % )	5 ( 11 % )	7 ( 10 % )
	Progress	24 ( 11 % )		3 ( 7 % )	6 ( 12 % )	15 ( 12 % )			7 ( 11 % )	4 ( 10 % )	7 ( 16 % )	6 ( 8 % )
Therapy failure	no	21 ( 10 % )		8 ( 18 % )	5 ( 10 % )	8 ( 6 % )	0.003		9 ( 15 % )	0 ( 0 % )	4 ( 9 % )	8 ( 11 % )	0.03
	yes	87 ( 39 % )		7 ( 16 % )	23 ( 48 % )	57 ( 44 % )			16 ( 26 % )	16 ( 38 % )	24 ( 55 % )	31 ( 42 % )
Survival state	dead	93 ( 42 % )		11 ( 25 % )	25 ( 52 % )	57 ( 44 % )	0.001		19 ( 31 % )	22 ( 52 % )	27 ( 61 % )	25 ( 34 % )	< 0.001
	alive	84 ( 38 % )		28 ( 64 % )	12 ( 25 % )	44 ( 34 % )			34 ( 55 % )	5 ( 12 % )	13 ( 30 % )	32 ( 44 % )
Follow-Up time	< 5 yr	124 ( 56 % )		17 ( 39 % )	29 ( 60 % )	78 ( 60 % )	0.002		27 ( 44 % )	22 ( 52 % )	34 ( 77 % )	41 ( 56 % )	0.01
	5 - 10 yr	30 ( 14 % )		11 ( 25 % )	5 ( 10 % )	14 ( 11 % )			13 ( 21 % )	4 ( 10 % )	4 ( 9 % )	9 ( 12 % )
	> 10 yr	23 ( 10 % )		11 ( 25 % )	3 ( 6 % )	9 ( 7 % )			13 ( 21 % )	1 ( 2 % )	2 ( 5 % )	7 ( 10 % )
Molecular classification	mBL	44 ( 20 % )		44 ( 100 % )	0 ( 0 % )	0 ( 0 % )	< 0.001		44 ( 71 % )	0 ( 0 % )	0 ( 0 % )	0 ( 0 % )	< 0.001
(Hummel et al.)	intermediate	48 ( 22 % )		0 ( 0 % )	48 ( 100 % )	0 ( 0 % )			18 ( 29 % )	11 ( 26 % )	10 ( 23 % )	9 ( 12 % )
	non-mBL	129 ( 58 % )		0 ( 0 % )	0 ( 0 % )	129 ( 100 % )			0 ( 0 % )	31 ( 74 % )	34 ( 77 % )	64 ( 88 % )
GCB-ABC classification	Activated B-cells	58 ( 26 % )		0 ( 0 % )	8 ( 17 % )	50 ( 39 % )	< 0.001		2 ( 3 % )	26 ( 62 % )	15 ( 34 % )	15 ( 21 % )	< 0.001
(Wright et al.)	Germinal center B-cells	120 ( 54 % )		40 ( 91 % )	34 ( 71 % )	46 ( 36 % )			53 ( 85 % )	10 ( 24 % )	18 ( 41 % )	39 ( 53 % )
	unclassified	43 ( 19 % )		4 ( 9 % )	6 ( 12 % )	33 ( 26 % )			7 ( 11 % )	6 ( 14 % )	11 ( 25 % )	19 ( 26 % )
Translocations
MYC translocation	IG-MYC	60 ( 27 % )		39 ( 89 % )	16 ( 33 % )	5 ( 4 % )	< 0.001		49 ( 79 % )	1 ( 2 % )	6 ( 14 % )	4 ( 5 % )	< 0.001
	non-IG-MYC	15 ( 7 % )		1 ( 2 % )	10 ( 21 % )	4 ( 3 % )			6 ( 10 % )	5 ( 12 % )	2 ( 5 % )	2 ( 3 % )
	neg	144 ( 65 % )		4 ( 9 % )	22 ( 46 % )	118 ( 91 % )			7 ( 11 % )	36 ( 86 % )	35 ( 80 % )	66 ( 90 % )
BCL6 Break	pos	37 ( 17 % )		0 ( 0 % )	7 ( 15 % )	30 ( 23 % )	< 0.001		2 ( 3 % )	9 ( 21 % )	11 ( 25 % )	15 ( 21 % )	0.002
	neg	179 ( 81 % )		43 ( 98 % )	40 ( 83 % )	96 ( 74 % )			59 ( 95 % )	32 ( 76 % )	31 ( 70 % )	57 ( 78 % )
IGH Break	pos	115 ( 52 % )		40 ( 91 % )	31 ( 65 % )	44 ( 34 % )	< 0.001		53 ( 85 % )	11 ( 26 % )	23 ( 52 % )	28 ( 38 % )	< 0.001
	neg	103 ( 47 % )		4 ( 9 % )	16 ( 33 % )	83 ( 64 % )			9 ( 15 % )	30 ( 71 % )	20 ( 45 % )	44 ( 60 % )
t(14;18) translocation	pos	25 ( 11 % )		1 ( 2 % )	10 ( 21 % )	14 ( 11 % )	0.02		5 ( 8 % )	2 ( 5 % )	6 ( 14 % )	12 ( 16 % )	0.19
	neg	193 ( 87 % )		43 ( 98 % )	38 ( 79 % )	112 ( 87 % )			57 ( 92 % )	40 ( 95 % )	37 ( 84 % )	59 ( 81 % )
Genetic group	MYC-simple	31 ( 14 % )		24 ( 55 % )	6 ( 12 % )	1 ( 1 % )	< 0.001		28 ( 45 % )	1 ( 2 % )	2 ( 5 % )	0 ( 0 % )	< 0.001
(Siebert et al.)	MYC-complex	39 ( 18 % )		11 ( 25 % )	20 ( 42 % )	8 ( 6 % )			22 ( 35 % )	5 ( 12 % )	6 ( 14 % )	6 ( 8 % )
	MYC-neg	141 ( 64 % )		4 ( 9 % )	22 ( 46 % )	115 ( 89 % )			7 ( 11 % )	36 ( 86 % )	32 ( 73 % )	66 ( 90 % )
Immunohistochemistry
CD20	low	5 ( 2 % )		0 ( 0 % )	3 ( 6 % )	2 ( 2 % )	0.16		2 ( 3 % )	0 ( 0 % )	1 ( 2 % )	2 ( 3 % )	0.87
	high	213 ( 96 % )		44 ( 100 % )	45 ( 94 % )	124 ( 96 % )			60 ( 97 % )	41 ( 98 % )	41 ( 93 % )	71 ( 97 % )
CD10	low	114 ( 52 % )		0 ( 0 % )	19 ( 40 % )	95 ( 74 % )	< 0.001		3 ( 5 % )	33 ( 79 % )	26 ( 59 % )	52 ( 71 % )	< 0.001
	high	96 ( 43 % )		42 ( 95 % )	27 ( 56 % )	27 ( 21 % )			56 ( 90 % )	6 ( 14 % )	14 ( 32 % )	20 ( 27 % )
CD5	low	178 ( 81 % )		34 ( 77 % )	34 ( 71 % )	110 ( 85 % )	0.22		47 ( 76 % )	38 ( 90 % )	33 ( 75 % )	60 ( 82 % )	0.10
	high	27 ( 12 % )		7 ( 16 % )	8 ( 17 % )	12 ( 9 % )			10 ( 16 % )	1 ( 2 % )	7 ( 16 % )	9 ( 12 % )
BCL2	low	62 ( 28 % )		33 ( 75 % )	8 ( 17 % )	21 ( 16 % )	< 0.001		38 ( 61 % )	2 ( 5 % )	7 ( 16 % )	15 ( 21 % )	< 0.001
	high	153 ( 69 % )		9 ( 20 % )	40 ( 83 % )	104 ( 81 % )			22 ( 35 % )	39 ( 93 % )	35 ( 80 % )	57 ( 78 % )
BCL6	low	34 ( 15 % )		1 ( 2 % )	7 ( 15 % )	26 ( 20 % )	0.007		5 ( 8 % )	9 ( 21 % )	7 ( 16 % )	13 ( 18 % )	0.21
	high	168 ( 76 % )		39 ( 89 % )	39 ( 81 % )	90 ( 70 % )			52 ( 84 % )	29 ( 69 % )	32 ( 73 % )	55 ( 75 % )
MUM1	low	66 ( 30 % )		20 ( 45 % )	21 ( 44 % )	25 ( 19 % )	< 0.001		29 ( 47 % )	7 ( 17 % )	8 ( 18 % )	22 ( 30 % )	0.001
	high	139 ( 63 % )		20 ( 45 % )	24 ( 50 % )	95 ( 74 % )			27 ( 44 % )	33 ( 79 % )	32 ( 73 % )	47 ( 64 % )
HLADR	low	48 ( 22 % )		12 ( 27 % )	6 ( 12 % )	30 ( 23 % )	0.15		16 ( 26 % )	10 ( 24 % )	5 ( 11 % )	17 ( 23 % )	0.51
	high	141 ( 64 % )		26 ( 59 % )	36 ( 75 % )	79 ( 61 % )			39 ( 63 % )	28 ( 67 % )	28 ( 64 % )	46 ( 63 % )
KI67	low	125 ( 57 % )		4 ( 9 % )	32 ( 67 % )	89 ( 69 % )	< 0.001		17 ( 27 % )	26 ( 62 % )	26 ( 59 % )	56 ( 77 % )	< 0.001
	high	89 ( 40 % )		40 ( 91 % )	15 ( 31 % )	34 ( 26 % )			44 ( 71 % )	15 ( 36 % )	14 ( 32 % )	16 ( 22 % )
T814	pos	1 ( 0 % )		0 ( 0 % )	0 ( 0 % )	1 ( 1 % )	1.00		0 ( 0 % )	0 ( 0 % )	1 ( 2 % )	0 ( 0 % )	1.00
	neg	11 ( 5 % )		1 ( 2 % )	4 ( 8 % )	6 ( 5 % )			2 ( 3 % )	3 ( 7 % )	3 ( 7 % )	3 ( 4 % )
